# Supplementary material for: Effectiveness of Folic Acid Supplementation Recommendations among Polish Female Students from the Podkarpackie Region
Source: MDPI journal article supplement (doi:10.3390/nu13031001), 2021-03-19
Supplement: s1 [file s1]

**File 1:** List of the survey questions

Section 1.

**Q1. Have you ever heard the term "folic acid"?**

- ☐ Yes
- ☐ No

**Q2. What is "folic acid"?** (only one option)

- ☐ water soluble vitamin
- ☐ fat soluble vitamin
- ☐ unsaturated fatty acid
- ☐ amino acid
- ☐ I don't know

**Q3. Please choose from the list those food products which are a rich source of folate (folic acid),**(any number of responses)

- ☐ citrus fruits
- ☐ dark green leafy vegetables
- ☐ white bread
- ☐ apples
- ☐ liver
- ☐ cheese
- ☐ I don't know

**Q4. Do you take folic acid in supplement form?** (only one option)

- ☐ Yes (**go to section 2**)
- ☐ yes, but only in the period when I am pregnant (**go to section 2**)
- ☐ no (**go to section 3**)

**Section 2**

**Q1.2 How often do you take folic acid?**

- ☐ every day
- ☐ a few times a week
- ☐ a few times a month

**Q2.2. Why do you take folic acid?**

- ☐ doctor's recommendation
- ☐ self-initiative
- ☐ other

**Section 3**

**Q1.3. If you do not take folic acid, why?**

- ☐ I do not feel such a need
- ☐ it is not important to me
- ☐ I don't know anything about folic acid
- ☐ I don't know

**Q2.3. Do you intend to take folic acid when planning pregnancy?**

- ☐ Yes

- No
- I don't know

**Q5. What is the recommended daily dose of folic acid for women of reproductive age (in Poland)?**

- 0.4 mg
- 0.5 mg
- 0.8 mg
- 1 mg
- I don't know

**Q6. What role do you think folic acid plays in the human body? (any number of responses)**

- lowers homocysteine levels
- prevents neural tube defects in the fetus
- contributes to regulation of development and maturation of red blood cells
- is an important factor in the prevention of cardiovascular diseases
- I don't know

**Q7. What is your main source of knowledge about folic acid: (any number of responses)**

- doctor (physician)
- school / college
- Internet
- TV
- magazines / books
- immediate family
- friends
- other
- does not apply

**Q8. How often do you eat the dark-leafy vegetables (e.g. broccoli, spinach, etc.)**

- every day
- 2-3 times a week
- once a week
- never

Table S1. The responses in the whole group ( N=1285)

| Question                                                                                            | Answers                                                     | N=1285 | %    |
|-----------------------------------------------------------------------------------------------------|-------------------------------------------------------------|--------|------|
| Q1.Have you ever heard the term 'folic acid'?                                                       | yes                                                         | 1157   | 90.0 |
|                                                                                                     | no                                                          | 128    | 10.0 |
| Q2.What is folic acid?                                                                              | fat soluble vitamin                                         | 140    | 10.9 |
|                                                                                                     | water soluble vitamin                                       | 179    | 13.9 |
|                                                                                                     | amino acid                                                  | 158    | 12.3 |
|                                                                                                     | unsaturated fatty acid                                      | 144    | 11.2 |
|                                                                                                     | I don't know                                                | 664    | 51.7 |
| Q3.Please choose from the list those food products which are a rich source of folate (folic acid) * | dark green leafy vegetables                                 | 534    | 41.6 |
|                                                                                                     | liver                                                       | 417    | 32.5 |
|                                                                                                     | citrus fruits                                               | 242    | 18.8 |
|                                                                                                     | apples                                                      | 101    | 7.9  |
|                                                                                                     | cheese                                                      | 76     | 5.9  |
|                                                                                                     | white bread                                                 | 33     | 2.6  |
|                                                                                                     | I don't know                                                | 450    | 35.0 |
| Q4.Do you take folic acid in supplement form?                                                       | yes                                                         | 90     | 7.0  |
|                                                                                                     | Yes, but only when I am pregnant                            | 89     | 6.9  |
|                                                                                                     | no                                                          | 1106   | 86.1 |
| Q5.What is the recommended daily dose of folic acid for women of reproductive age (in Poland)?      | 0.4 mg                                                      | 114    | 8.9  |
|                                                                                                     | 0.5 mg                                                      | 103    | 8.0  |
|                                                                                                     | 0.8 mg                                                      | 80     | 6.2  |
|                                                                                                     | 1 mg                                                        | 42     | 3.3  |
|                                                                                                     | I don't know                                                | 946    | 73.6 |
| Q6.What role do you think folic acid plays in the human body?*                                      | prevention of neural tube defects in the fetus              | 522    | 40.6 |
|                                                                                                     | regulation of development and maturation of red blood cells | 311    | 24.2 |
|                                                                                                     | prevention of cardiovascular diseases                       | 118    | 9.2  |
|                                                                                                     | lowers homocysteine levels                                  | 53     | 4.1  |
|                                                                                                     | I don't know                                                | 542    | 42.2 |
| Q7.What is your main source of knowledge about folic acid?*                                         | Internet                                                    | 681    | 53.0 |
|                                                                                                     | physician                                                   | 349    | 27.2 |
|                                                                                                     | school / college                                            | 290    | 22.6 |
|                                                                                                     | magazines / books                                           | 204    | 15.9 |
|                                                                                                     | TV                                                          | 175    | 13.6 |
|                                                                                                     | immediate family                                            | 157    | 12.2 |
|                                                                                                     | friends                                                     | 122    | 9.5  |
|                                                                                                     | other                                                       | 74     | 5.8  |
|                                                                                                     | does not apply                                              | 226    | 17.6 |
| Q8. How often do you eat the dark-leafy vegetables (e.g. broccoli, spinach, etc.)?                  | every day                                                   | 48     | 3.8  |
|                                                                                                     | 2-3 times a week                                            | 318    | 24.7 |
|                                                                                                     | once a week                                                 | 713    | 55.5 |
|                                                                                                     | never                                                       | 206    | 16.0 |

\* any number of responses

Table S2. The responses in the subgroup (N=1127)

| Question                                                                                             | Answers                                                     | N=1127 | %    |
|------------------------------------------------------------------------------------------------------|-------------------------------------------------------------|--------|------|
| Q1. Have you ever heard the term 'folic acid'?                                                       | yes                                                         | 1004   | 89.1 |
|                                                                                                      | no                                                          | 123    | 10.9 |
| Q2. What is folic acid?                                                                              | fat soluble vitamin                                         | 122    | 10.8 |
|                                                                                                      | water soluble vitamin                                       | 147    | 13.0 |
|                                                                                                      | amino acid                                                  | 142    | 12.6 |
|                                                                                                      | unsaturated fatty acid                                      | 124    | 11.0 |
|                                                                                                      | I don't know                                                | 592    | 52.5 |
| Q3. Please choose from the list those food products which are a rich source of folate (folic acid) * | dark green leafy vegetables                                 | 430    | 38.2 |
|                                                                                                      | liver                                                       | 369    | 32.7 |
|                                                                                                      | citrus fruits                                               | 212    | 18.8 |
|                                                                                                      | apples                                                      | 82     | 7.3  |
|                                                                                                      | cheese                                                      | 68     | 6.0  |
|                                                                                                      | white bread                                                 | 29     | 2.6  |
|                                                                                                      | I don't know                                                | 419    | 37.2 |
| Q4. Do you take folic acid in supplement form?                                                       | yes                                                         | 75     | 6.7  |
|                                                                                                      | Yes, but only when I am pregnant                            | -      | -    |
|                                                                                                      | no                                                          | 1052   | 93.3 |
| Q5. What is the recommended daily dose of folic acid for women of reproductive age (in Poland)?      | 0.4 mg                                                      | 81     | 7.2  |
|                                                                                                      | 0.5 mg                                                      | 94     | 8.3  |
|                                                                                                      | 0.8 mg                                                      | 70     | 6.2  |
|                                                                                                      | 1 mg                                                        | 36     | 3.2  |
|                                                                                                      | I don't know                                                | 846    | 75.1 |
| Q6. What role do you think folic acid plays in the human body?*                                      | prevention of neural tube defects in the fetus              | 415    | 36.8 |
|                                                                                                      | regulation of development and maturation of red blood cells | 245    | 21.7 |
|                                                                                                      | prevention of cardiovascular diseases                       | 105    | 9.3  |
|                                                                                                      | lowers homocysteine levels                                  | 45     | 4.0  |
|                                                                                                      | I don't know                                                | 515    | 45.7 |
| Q7. What is your main source of knowledge about folic acid?*                                         | Internet                                                    | 592    | 52.5 |
|                                                                                                      | physician                                                   | 272    | 24.1 |
|                                                                                                      | school / college                                            | 266    | 23.6 |
|                                                                                                      | magazines / books                                           | 161    | 14.3 |
|                                                                                                      | TV                                                          | 160    | 14.2 |
|                                                                                                      | immediate family                                            | 146    | 13.0 |
|                                                                                                      | friends                                                     | 101    | 9.0  |
|                                                                                                      | other                                                       | 69     | 6.1  |
| Q8. How often do you eat the dark-leafy vegetables (e.g. broccoli, spinach, etc.)?                   | does not apply                                              | 215    | 19.1 |
|                                                                                                      | every day                                                   | 42     | 3.7  |
|                                                                                                      | 2-3 times a week                                            | 272    | 24.1 |
|                                                                                                      | once a week                                                 | 634    | 56.3 |
|                                                                                                      | never                                                       | 179    | 15.9 |

\* any number of responses

Table S3. Self-assessment of the frequency of consumption of leafy vegetables in the group of examined women.

| Frequency of<br>consumption of leafy<br>greens vegetables | Supplementation with folic acid ( $p = 0.334$ ) |      |    |      |       |      |
|-----------------------------------------------------------|-------------------------------------------------|------|----|------|-------|------|
|                                                           | Yes                                             |      | No |      | Total |      |
|                                                           | N                                               | %    | N  | %    | N     | %    |
| Every day                                                 | 42                                              | 4.0  | 0  | 0.0  | 42    | 3.7  |
| 2-3 times a week                                          | 254                                             | 24.1 | 18 | 24.0 | 272   | 24.1 |
| Once a week                                               | 591                                             | 56.2 | 43 | 57.3 | 634   | 56.3 |
| Never                                                     | 165                                             | 15.7 | 14 | 18.7 | 179   | 15.9 |

Table S4. The reasons for not using folic acid supplementation vs. declared frequency of consumption of leafy green vegetables.

| Frequency of<br>consumption of<br>leafy greens<br>vegetables | Why do you not take folic acid? ( $p = 0.896$ ) |      |                                    |      |                        |      |              |      |
|--------------------------------------------------------------|-------------------------------------------------|------|------------------------------------|------|------------------------|------|--------------|------|
|                                                              | there is no need                                |      | I know nothing<br>about folic acid |      | not important<br>to me |      | I don't know |      |
|                                                              | N                                               | %    | N                                  | %    | N                      | %    | N            | %    |
| Every day                                                    | 23                                              | 4.5  | 8                                  | 3.5  | 4                      | 6.9  | 7            | 2.8  |
| 2-3 times a week                                             | 124                                             | 24.1 | 51                                 | 22.6 | 13                     | 22.4 | 66           | 26.1 |
| Once a week                                                  | 292                                             | 56.7 | 127                                | 56.2 | 32                     | 55.2 | 140          | 55.3 |
| Never                                                        | 76                                              | 14.8 | 40                                 | 17.7 | 9                      | 15.5 | 40           | 15.8 |
